# Supplementary material for: Categorization of Marijuana Suspected Policies’ Seizures in Southeast Serbia According to Cannabinoids Content
Source: MDPI journal article supplement (doi:10.3390/separations10050307), 2023-05-12
Supplement: s1 [file s1]

**Table S1. Gas chromatographer and mass spectrometer parameters**

| <b>GC parametres</b>    |                 | <b>MS parametres</b>  |        |
|-------------------------|-----------------|-----------------------|--------|
| Column Oven Temperature | 90 °C           | Ion Sorce Temperature | 200 °C |
| Injection Temperature   | 275 °C          | Interface Temperature | 280 °C |
| Injection Mode          | split           | Solvent Cut Time      | 5 min  |
| Split Ratio             | 10              |                       |        |
| Carrier Gas             | He              |                       |        |
| Flow Control Mode       | Linear Velocity |                       |        |
| Pressure                | 107.1 kPa       |                       |        |
| Total Flow              | 19.5 mL/min     |                       |        |
| Column Flow             | 1.50 mL/min     |                       |        |
| Linear Velocity         | 45.3 cm/sec     |                       |        |
| Purge Flow              | 3 mL/min        |                       |        |
